# Supplementary material for: Causal Role of Immune Cells in Prostate Cancer: A Mendelian Randomization Study
Source: Preprints.org preprint supplement (doi:10.20944/preprints202311.0976.v1), 2023-11-15
Supplement: Supplementary file 1 [file supplementary]

## Sheet: 森林图表格-全算法
	nSNP	OR	lower.95	upper.95	HR(95％CI)	pval
IgD- CD38- %lymphocyte
MR Egger	29	0.998	0.994	1.002	0.994-1.002	0.32
Weighted median	29	0.997	0.994	1	0.994-1	0.098
Inverse variance weighted	29	0.998	0.996	1	0.996-1	0.022
Simple mode	29	0.996	0.991	1.002	0.991-1.002	0.197
Weighted mode	29	0.997	0.993	1.001	0.993-1.001	0.212
CD62L- monocyte AC
MR Egger	19	1.002	0.998	1.006	0.998-1.006	0.35
Weighted median	19	1.001	0.998	1.004	0.998-1.004	0.525
Inverse variance weighted	19	1.002	1	1.004	1.000-1.004	0.045
Simple mode	19	1.002	0.997	1.007	0.997-1.007	0.524
Weighted mode	19	1.001	0.997	1.005	0.997-1.005	0.547
CD62L- monocyte %monocyte
MR Egger	23	1.004	1	1.009	1.000-1.009	0.067
Weighted median	23	1.002	1	1.005	1.000-1.005	0.087
Inverse variance weighted	23	1.002	1	1.004	1.000-1.004	0.02
Simple mode	23	1	0.995	1.005	0.995-1.005	0.949
Weighted mode	23	1.005	1.002	1.009	1.002-1.009	0.012
CD62L- HLA DR++ monocyte AC
MR Egger	18	0.999	0.992	1.005	0.992-1.005	0.682
Weighted median	18	0.996	0.992	1	0.992-1.000	0.053
Inverse variance weighted	18	0.997	0.994	0.999	0.994-0.999	0.022
Simple mode	18	0.994	0.986	1.001	0.986-1.001	0.12
Weighted mode	18	0.994	0.986	1.002	0.986-1.002	0.166
CD62L- DC AC
MR Egger	19	1.002	1	1.003	1.000-1.003	0.019
Weighted median	19	1.002	1	1.003	1.000-1.003	0.023
Inverse variance weighted	19	1.002	1	1.003	1.000-1.003	0.004
Simple mode	19	1.002	0.999	1.004	0.999-1.004	0.171
Weighted mode	19	1.002	1	1.003	1.000-1.003	0.017
CD39+ resting Treg AC
MR Egger	25	0.999	0.997	1.001	0.997-1.001	0.22
Weighted median	25	1	0.998	1.002	0.998-1.002	0.975
Inverse variance weighted	25	0.999	0.997	1	0.997-1.000	0.04
Simple mode	25	0.999	0.996	1.003	0.996-1.003	0.687
Weighted mode	25	1	0.998	1.002	0.998-1.002	0.845
CD39+ resting Treg % CD4 Treg
MR Egger	31	0.999	0.999	1	0.999-1.000	0.041
Weighted median	31	1	0.999	1	0.999-1.000	0.187
Inverse variance weighted	31	0.999	0.999	1	0.999-1.000	0.014
Simple mode	31	1	0.998	1.001	0.998-1.001	0.64
Weighted mode	31	1	0.999	1	0.999-1.000	0.099
Mo MDSC AC
MR Egger	18	0.997	0.993	1.001	0.993-1.001	0.199
Weighted median	18	0.998	0.995	1.001	0.995-1.001	0.13
Inverse variance weighted	18	0.998	0.996	0.999	0.996-0.999	0.012
Simple mode	18	0.999	0.994	1.004	0.994-1.004	0.739
Weighted mode	18	0.998	0.994	1.001	0.994-1.001	0.239
CD14+ CD16+ monocyte AC
MR Egger	20	0.997	0.993	1	0.993-1.000	0.057
Weighted median	20	0.998	0.995	1	0.995-1.000	0.082
Inverse variance weighted	20	0.998	0.996	1	0.996-1.000	0.03
Simple mode	20	0.997	0.993	1.001	0.993-1.001	0.168
Weighted mode	20	0.998	0.995	1	0.995-1.000	0.092
CD14+ CD16- monocyte %monocyte
MR Egger	26	1	0.999	1.002	0.999-1.002	0.565
Weighted median	26	1.001	0.999	1.003	0.999-1.003	0.326
Inverse variance weighted	26	1.001	1	1.002	1.000-1.002	0.043
Simple mode	26	1.003	0.999	1.006	0.999-1.006	0.141
Weighted mode	26	1	0.999	1.002	0.999-1.002	0.666
CD16+ monocyte %monocyte
MR Egger	24	0.997	0.993	1.001	0.993-1.001	0.202
Weighted median	24	0.997	0.993	1	0.993-1.000	0.031
Inverse variance weighted	24	0.998	0.995	1	0.995-1.000	0.042
Simple mode	24	0.997	0.992	1.002	0.992-1.002	0.25
Weighted mode	24	0.996	0.992	1	0.992-1.000	0.077
CD8br NKT %T cell
MR Egger	27	1.002	0.999	1.006	0.999-1.006	0.218
Weighted median	27	1.002	0.999	1.006	0.999-1.006	0.169
Inverse variance weighted	27	1.002	1	1.005	1.000-1.005	0.033
Simple mode	27	1.005	0.999	1.01	0.999-1.01	0.099
Weighted mode	27	1.003	0.999	1.008	0.999-1.008	0.184
CD8br NKT %T cell
MR Egger	22	0.999	0.996	1.002	0.996-1.002	0.496
Weighted median	22	0.998	0.995	1	0.995-1.000	0.061
Inverse variance weighted	22	0.998	0.997	1	0.997-1.000	0.049
Simple mode	22	0.999	0.995	1.003	0.995-1.003	0.566
Weighted mode	22	0.998	0.995	1.001	0.995-1.001	0.13
CD28- CD8dim AC
MR Egger	26	1.002	0.999	1.005	0.999-1.005	0.235
Weighted median	26	1.003	1	1.005	1.000-1.005	0.041
Inverse variance weighted	26	1.002	1	1.004	1.000-1.004	0.022
Simple mode	26	1.004	0.999	1.009	0.999-1.009	0.132
Weighted mode	26	1.003	1	1.007	1-1.007	0.072
CD39+ CD8br %CD8br
MR Egger	20	0.998	0.996	1.001	0.996-1.001	0.154
Weighted median	20	0.999	0.996	1.001	0.996-1.001	0.25
Inverse variance weighted	20	0.998	0.996	1	0.996-1.000	0.021
Simple mode	20	1	0.996	1.003	0.996-1.003	0.827
Weighted mode	20	0.999	0.996	1.002	0.996-1.002	0.497
CD127- CD8br %CD8br
MR Egger	12	1.002	0.997	1.007	0.997-1.007	0.502
Weighted median	12	1.002	0.997	1.006	0.997-1.006	0.42
Inverse variance weighted	12	1.004	1.001	1.007	1.001-1.007	0.008
Simple mode	12	1.002	0.995	1.01	0.995-1.01	0.502
Weighted mode	12	1.002	0.998	1.006	0.998-1.006	0.413
CD19 on CD20- CD38-
MR Egger	20	0.998	0.995	1.002	0.995-1.002	0.38
Weighted median	20	0.998	0.995	1.001	0.995-1.001	0.245
Inverse variance weighted	20	0.998	0.995	1	0.995-1.000	0.029
Simple mode	20	0.999	0.994	1.004	0.994-1.004	0.636
Weighted mode	20	0.998	0.995	1.001	0.995-1.001	0.262
CD19 on IgD- CD38br
MR Egger	16	1	0.996	1.003	0.996-1.003	0.802
Weighted median	16	0.998	0.995	1.001	0.995-1.001	0.235
Inverse variance weighted	16	0.998	0.996	1	0.996-1.000	0.048
Simple mode	16	0.997	0.993	1.002	0.993-1.002	0.248
Weighted mode	16	0.998	0.995	1.001	0.995-1.001	0.253
CD19 on sw mem
MR Egger	28	1.007	1.003	1.012	1.003-1.012	0.002
Weighted median	28	1.004	1.001	1.007	1.001-1.007	0.007
Inverse variance weighted	28	1.002	1	1.005	1.000-1.005	0.049
Simple mode	28	1.006	0.999	1.014	0.999-1.014	0.089
Weighted mode	28	1.006	1	1.012	1.000-1.012	0.051
CD25 on unsw mem
MR Egger	22	0.999	0.997	1	0.997-1.000	0.066
Weighted median	22	0.999	0.997	1	0.997-1.000	0.102
Inverse variance weighted	22	0.999	0.997	1	0.997-1.000	0.02
Simple mode	22	0.998	0.995	1	0.995-1.000	0.078
Weighted mode	22	0.999	0.997	1	0.997-1.000	0.075
CD27 on PB/PC
MR Egger	19	1.003	1	1.005	1.000-1.005	0.056
Weighted median	19	1.003	1	1.006	1.000-1.006	0.077
Inverse variance weighted	19	1.002	1	1.004	1.000-1.004	0.04
Simple mode	19	1.004	0.997	1.01	0.997-1.01	0.27
Weighted mode	19	1.003	1	1.006	1.000-1.006	0.067
HVEM on EM CD4+
MR Egger	21	0.998	0.995	1.002	0.995-1.002	0.339
Weighted median	21	1.001	0.999	1.003	0.999-1.003	0.434
Inverse variance weighted	21	1.002	1	1.003	1.000-1.003	0.048
Simple mode	21	1	0.996	1.004	0.996-1.004	0.991
Weighted mode	21	1	0.997	1.003	0.997-1.003	0.94
CD16-CD56 on NKT
MR Egger	24	1.002	0.999	1.005	0.999-1.005	0.183
Weighted median	24	1.001	0.999	1.004	0.999-1.004	0.347
Inverse variance weighted	24	1.002	1.001	1.004	1.001-1.004	0.01
Simple mode	24	1	0.996	1.005	0.996-1.005	0.891
Weighted mode	24	1.001	0.997	1.004	0.997-1.004	0.694
CD45 on NKT
MR Egger	24	1.001	0.999	1.003	0.999-1.003	0.231
Weighted median	24	1.001	0.999	1.003	0.999-1.003	0.421
Inverse variance weighted	24	1.002	1	1.003	1.000-1.003	0.015
Simple mode	24	1.004	1	1.008	1.000-1.008	0.058
Weighted mode	24	1.001	0.999	1.002	0.999-1.002	0.55
CD127 on CD28+ CD4+
MR Egger	19	0.998	0.996	1	0.996-1.000	0.086
Weighted median	19	0.999	0.997	1.001	0.997-1.001	0.28
Inverse variance weighted	19	0.999	0.997	1	0.997-1.000	0.042
Simple mode	19	0.999	0.996	1.002	0.996-1.002	0.548
Weighted mode	19	0.999	0.997	1.001	0.997-1.001	0.353
CD127 on CD28- CD8br
MR Egger	17	1	0.996	1.003	0.996-1.003	0.942
Weighted median	17	0.999	0.996	1.002	0.996-1.002	0.625
Inverse variance weighted	17	0.998	0.996	1	0.996-1.000	0.043
Simple mode	17	0.998	0.993	1.004	0.993-1.004	0.506
Weighted mode	17	1	0.997	1.003	0.997-1.003	0.949
CD25 on CD45RA+ CD4 not Treg
MR Egger	22	0.999	0.997	1.001	0.997-1.001	0.292
Weighted median	22	0.999	0.997	1.001	0.997-1.001	0.271
Inverse variance weighted	22	0.998	0.997	1	0.997-1.000	0.028
Simple mode	22	0.998	0.994	1.002	0.994-1.002	0.276
Weighted mode	22	0.999	0.997	1.001	0.997-1.001	0.167
CD4 on monocyte
MR Egger	14	0.998	0.996	1	0.996-1.000	0.099
Weighted median	14	0.998	0.996	1.001	0.996-1.001	0.142
Inverse variance weighted	14	0.998	0.996	0.999	0.996-0.999	0.011
Simple mode	14	0.996	0.992	1	0.992-1.000	0.069
Weighted mode	14	0.998	0.996	1	0.996-1.000	0.131
FSC-A on plasmacytoid DC
MR Egger	26	0.998	0.996	0.999	0.996-0.999	0.014
Weighted median	26	0.998	0.996	0.999	0.996-0.999	0.008
Inverse variance weighted	26	0.998	0.997	1	0.997-1.000	0.007
Simple mode	26	0.999	0.996	1.002	0.996-1.002	0.583
Weighted mode	26	0.998	0.996	1	0.996-1.000	0.05
CCR2 on CD14+ CD16+ monocyte
MR Egger	37	0.999	0.998	1	0.998-1.000	0.099
Weighted median	37	0.999	0.998	1	0.998-1.000	0.103
Inverse variance weighted	37	0.999	0.998	1	0.998-1.000	0.032
Simple mode	37	0.999	0.998	1.001	0.998-1.001	0.337
Weighted mode	37	0.999	0.998	1	0.998-1.000	0.038
CX3CR1 on monocyte
MR Egger	25	1.004	1	1.007	1.000-1.007	0.053
Weighted median	25	1.002	0.999	1.005	0.999-1.005	0.116
Inverse variance weighted	25	1.002	1	1.004	1.000-1.004	0.021
Simple mode	25	1.001	0.997	1.006	0.997-1.006	0.561
Weighted mode	25	1.002	0.999	1.005	0.999-1.005	0.137
CX3CR1 on CD14+ CD16- monocyte
MR Egger	26	1.002	1	1.005	1.000-1.005	0.084
Weighted median	26	1.002	1	1.004	1.000-1.004	0.032
Inverse variance weighted	26	1.002	1.001	1.004	1.001-1.004	0.002
Simple mode	26	1.002	0.998	1.005	0.998-1.005	0.407
Weighted mode	26	1.002	1	1.004	1.000-1.004	0.088
HLA DR on monocyte
MR Egger	16	1.004	1.001	1.006	1.001-1.006	0.009
Weighted median	16	1.002	1	1.004	1.000-1.004	0.041
Inverse variance weighted	16	1.002	1	1.003	1.000-1.003	0.032
Simple mode	16	0.999	0.995	1.003	0.995-1.003	0.642
Weighted mode	16	1.003	1.001	1.005	1.001-1.005	0.012
CD45RA on CD39+ resting Treg
MR Egger	10	1.002	1	1.005	1.000-1.005	0.11
Weighted median	10	1.003	1	1.005	1.000-1.005	0.038
Inverse variance weighted	10	1.003	1.001	1.005	1.001-1.005	0.013
Simple mode	10	1.003	0.999	1.007	0.999-1.007	0.152
Weighted mode	10	1.003	1	1.005	1.000-1.005	0.068
